---

# Erratum

Wheeler ML, Dunbar SA, Jaacks LM, Karmally W, Mayer-Davis EJ, Wylie-Rosett J, Yancy WS. **Macronutrients, food groups, and eating patterns in the management of diabetes: a systematic review of the literature, 2010.** *Diabetes Care* 2012;35:434–445

In the print version of the article listed above, the results of a published study (reference 104) were misquoted. In the “Summary of Reviewed Studies” section, the second and last sentence in the second paragraph should have read, “Those assigned to the Mediterranean eating pattern had lower A1C levels compared with those following the lower-fat eating pattern.” The online version reflects these changes.
